# Supplementary material
Source: PubMed Central journal article supplement (PMC7891760)
Supplement: NIHMS1665886-supplement-Supplemental_figures_tables.pdf [file NIHMS1665886-supplement-Supplemental_figures_tables.pdf]

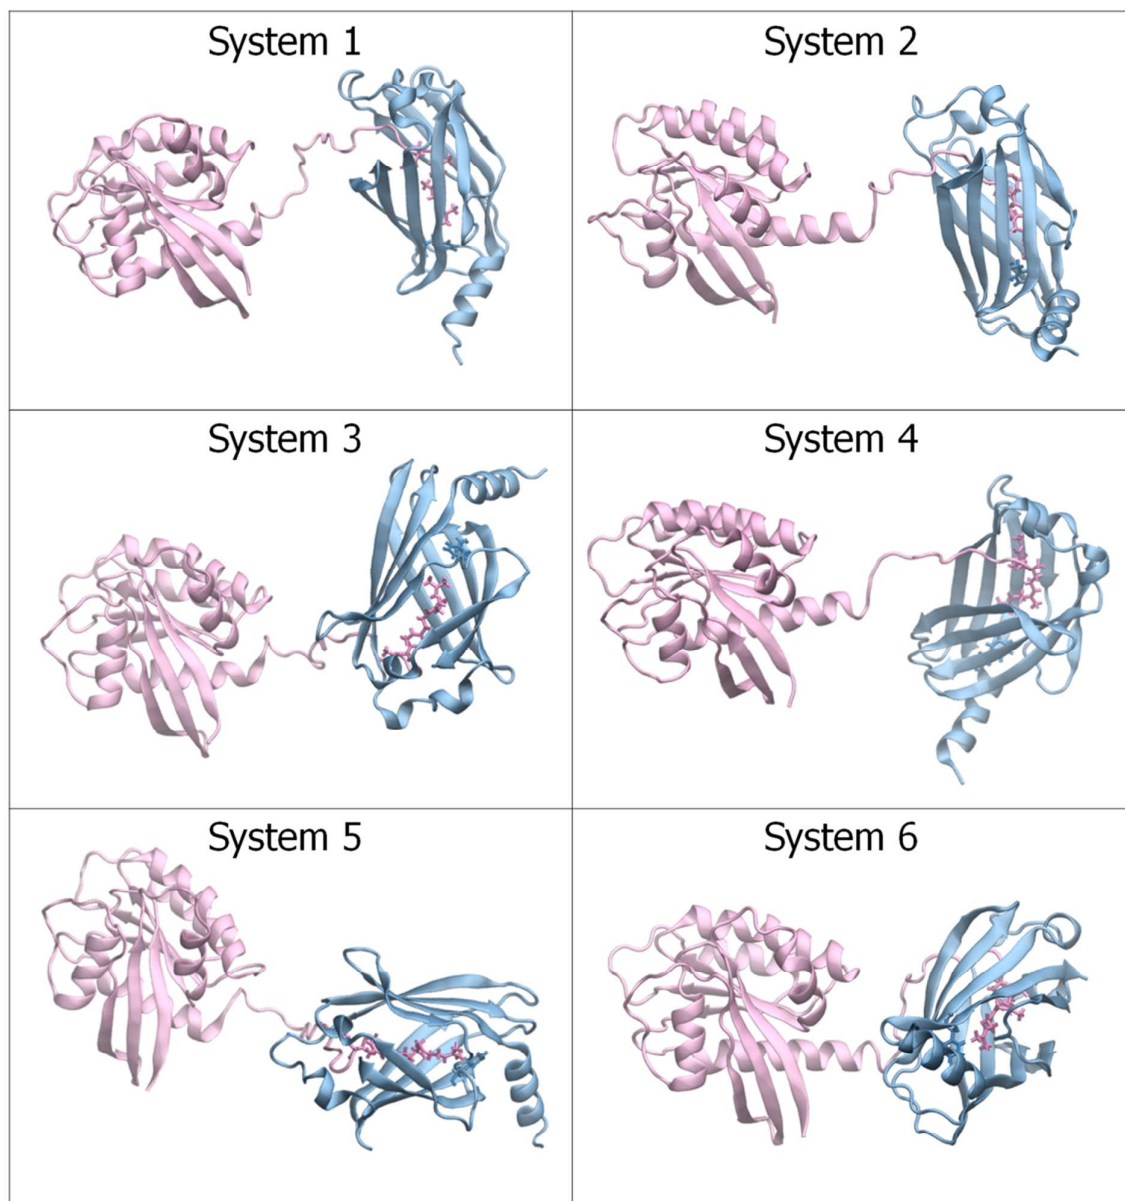

**Figure S1.** Starting points of the K-Ras4B-GTP/PDE $\delta$  systems for the atomistic molecular dynamics (MD) simulations in a water environment. The details of each system are shown in Table 1.

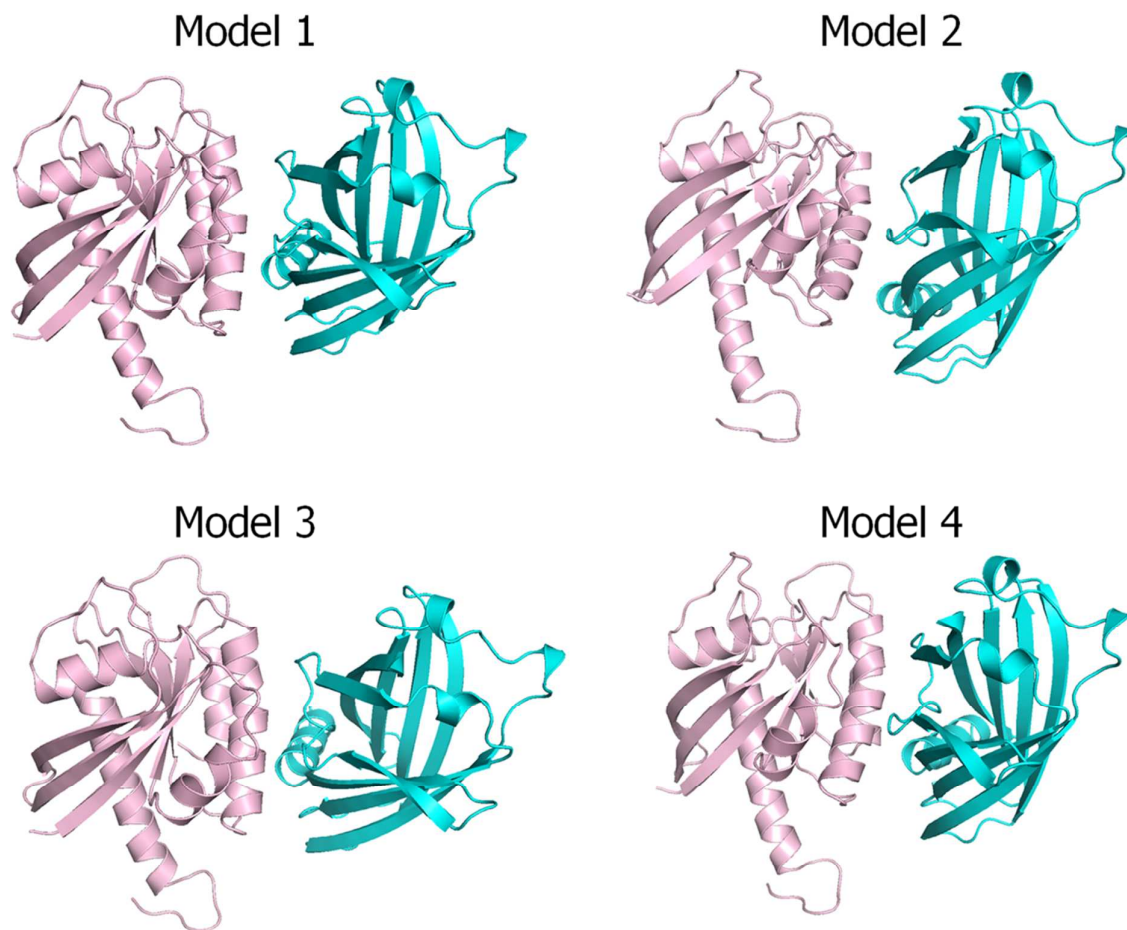

**Figure S2.** Predicted models of the K-Ras4B catalytic domain interacting with PDE $\delta$  by using the standard Rosetta global docking method.

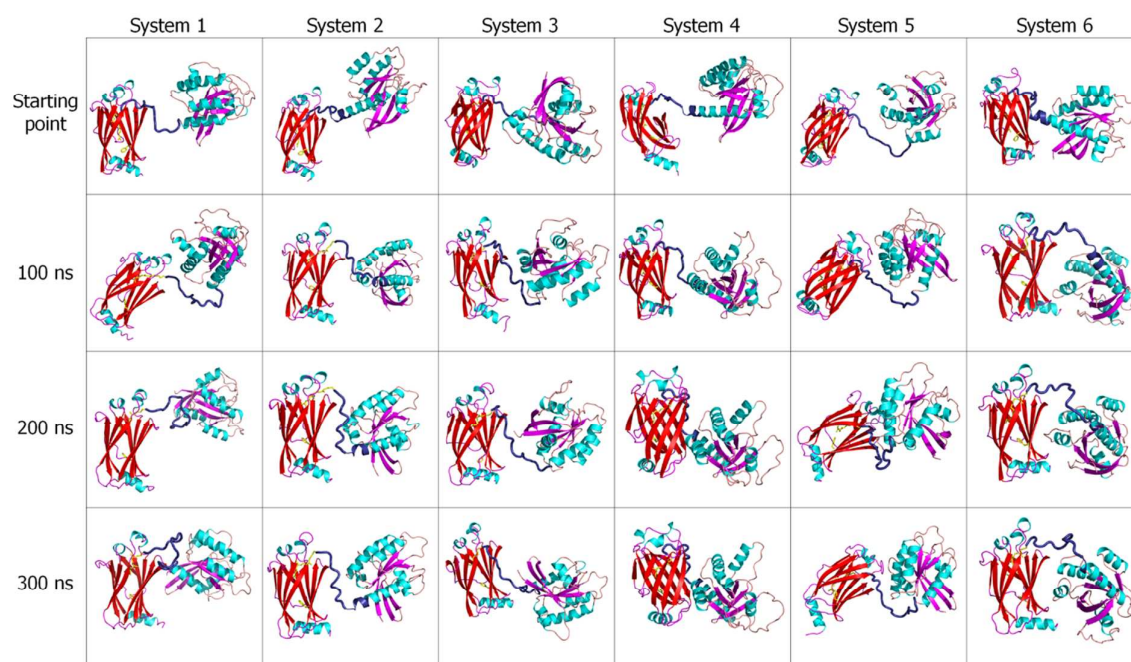

**Figure S3.** The snapshots of K-Ras4B-GTP/PDE $\delta$  complex (System 1 – System 6) at the start point, 100 ns, 200 ns, and 300 ns run points.

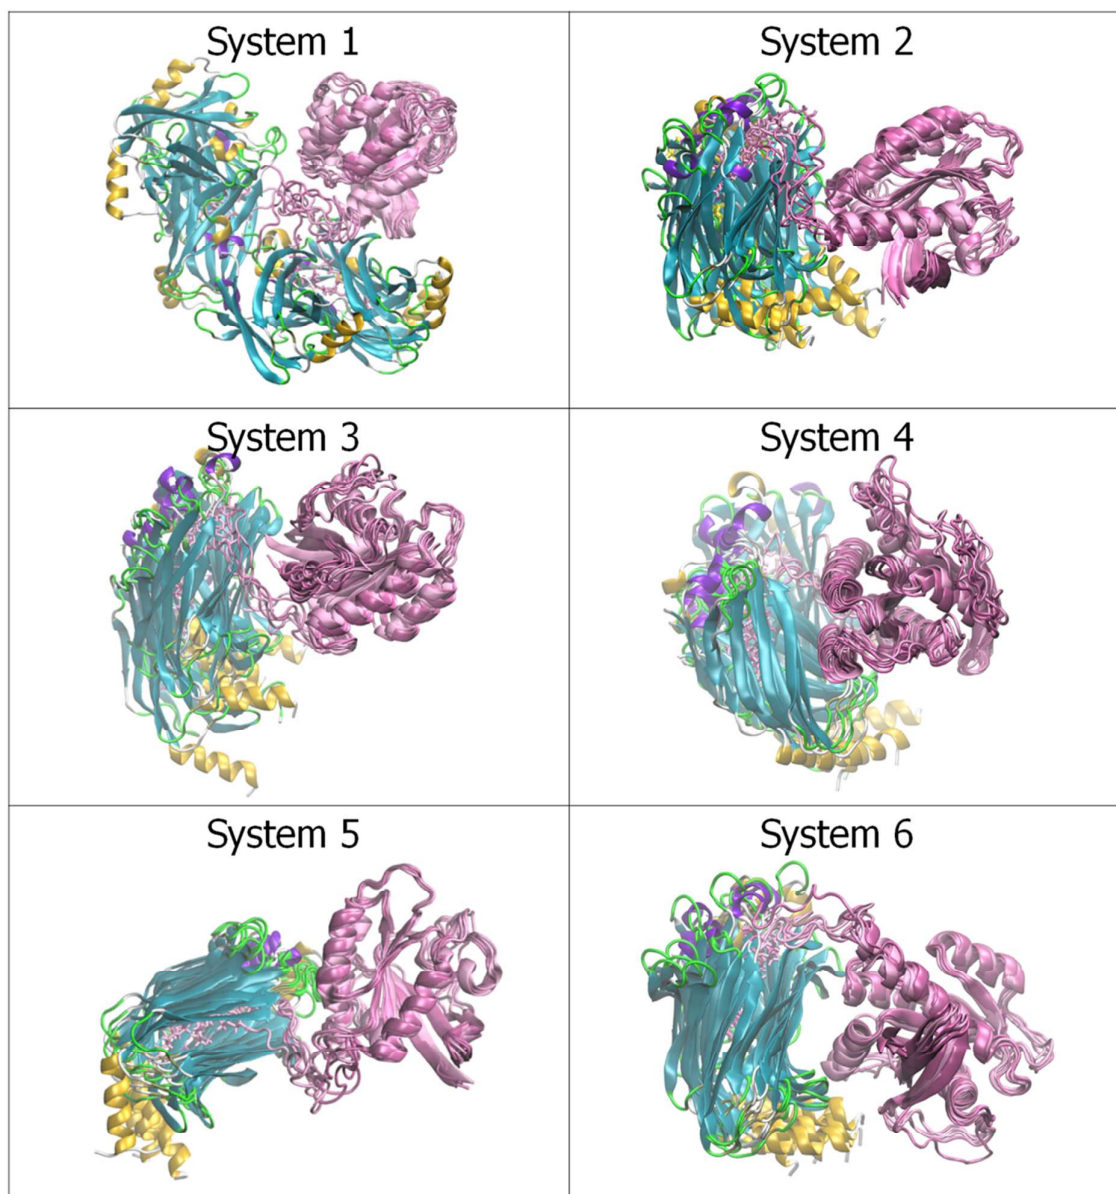

**Figure S4.** The superimposed snapshots taken every 50 ns simulations of these six K-Ras4B-GTP/PDE $\delta$  systems.

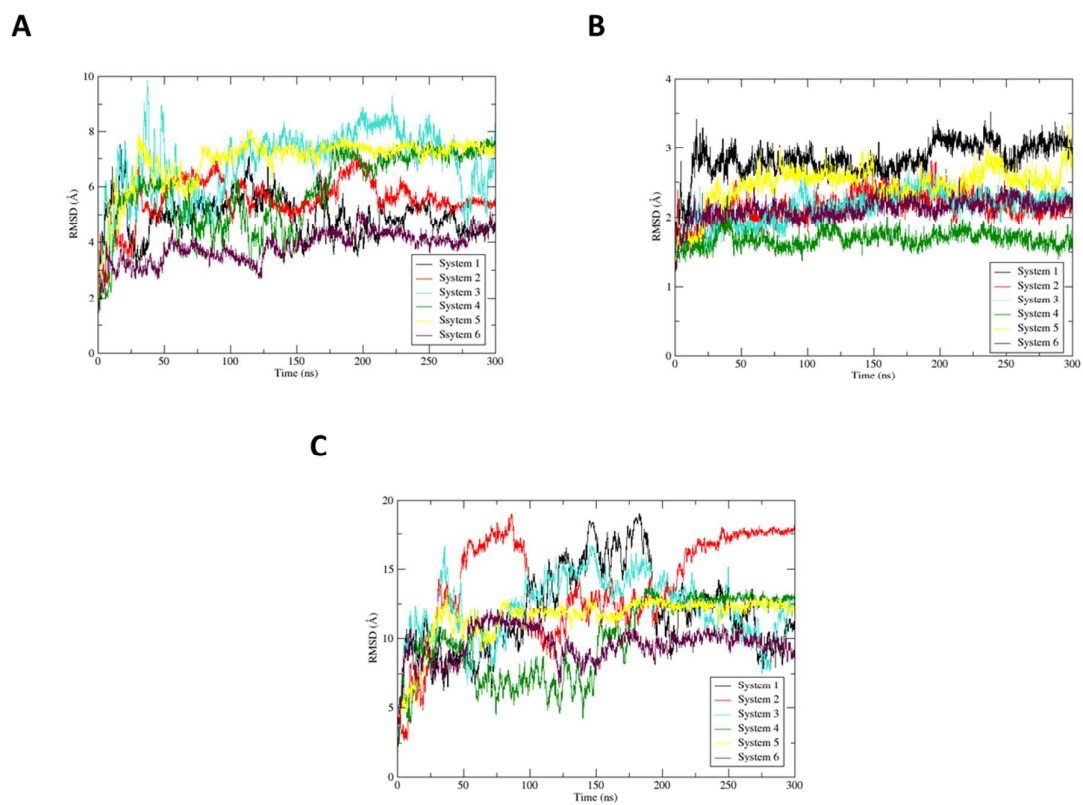

**Figure S5.** Root-mean-squared deviations (RMSDs) of (A) K-Ras4B, (B) PDE $\delta$ , and (C) K-Ras4B/PDE $\delta$  complex in the six K-Ras4B/PDE $\delta$  systems.

**A**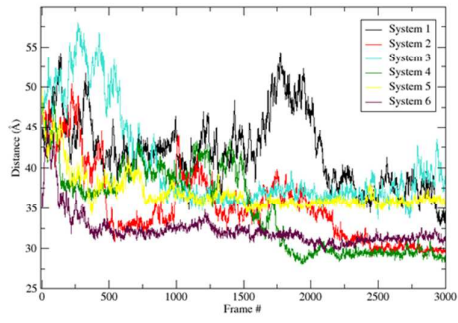**B**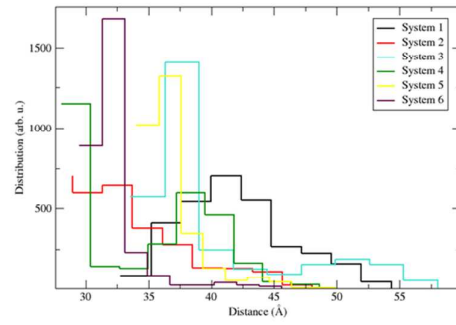

**Figure S6.** Distance analysis of the six K-Ras4B/PDE $\delta$  systems. (A) The center of mass distance between K-Ras4B and PDE $\delta$  of the six K-Ras4B/PDE $\delta$  systems. (B) Distribution of the center of mass distance of the six simulated K-Ras4B/PDE $\delta$  systems.

**Table S1.** Average RMSD values of the K-Ras4B, PDE $\delta$  and K-Ras4B/PDE $\delta$  complex

| Configuration   | Average RMSD (Å) |               |                |
|-----------------|------------------|---------------|----------------|
|                 | K-Ras4B          | PDED $\delta$ | Complex        |
| <b>System 1</b> | 4.9 $\pm$ 0.7    | 2.8 $\pm$ 0.3 | 11.9 $\pm$ 3.1 |
| <b>System 2</b> | 5.5 $\pm$ 0.8    | 2.1 $\pm$ 0.2 | 13.9 $\pm$ 3.6 |
| <b>System 3</b> | 6.9 $\pm$ 1.2    | 2.2 $\pm$ 0.2 | 12.3 $\pm$ 2.3 |
| <b>System 4</b> | 5.8 $\pm$ 1.3    | 1.7 $\pm$ 0.1 | 9.9 $\pm$ 2.8  |
| <b>System 5</b> | 6.9 $\pm$ 0.9    | 2.5 $\pm$ 0.3 | 11.6 $\pm$ 1.7 |
| <b>System 6</b> | 3.8 $\pm$ 0.5    | 2.1 $\pm$ 0.2 | 9.6 $\pm$ 1.2  |

**Table S2.** Types of atomic interactions in the prenylated K-Ras4B-GTP/PDE $\delta$  complex. The number in the parenthesis denotes percentage of the atomic pair interaction based on the distance between the paired atoms.

| <b>Configuration</b> | <b>H-bond<br/>K-Ras4B / PDE<math>\delta</math> (%)</b>                                                                                                                                                                                                             | <b>Salt-bridge<br/>K-Ras4B / PDE<math>\delta</math> (%)</b>                                                                                               |
|----------------------|--------------------------------------------------------------------------------------------------------------------------------------------------------------------------------------------------------------------------------------------------------------------|-----------------------------------------------------------------------------------------------------------------------------------------------------------|
| <b>System 1</b>      | Lys184 / Glu88 (34.92)                                                                                                                                                                                                                                             | Lys184 / Glu88 (28.92)                                                                                                                                    |
| <b>System 2</b>      | Lys184 / Glu88 (45.50)<br>Lys182 / Glu89 (22.17)<br>Glu63 / Arg9 (19.33)<br>Lys178 / Glu88 (16.75)<br>Lys177 / Glu89 (16.50)<br>Asp105 / Lys79 (16.00)                                                                                                             | Lys177 / Glu89 (28.58)<br>Lys184 / Glu88 (25.00)<br>Asp105 / Lys79 (17.92)<br>Lys182 / Glu88 (17.75)<br>Asp105 / Lys132 (16.25)<br>Lys178 / Glu88 (15.08) |
| <b>System 3</b>      | Lys184 / Glu88 (30.92)<br>Thr183 / Glu88 (27.92)<br>Lys176 / Glu77 (24.58)<br>Lys178 / Glu93 (20.25)                                                                                                                                                               | Lys176 / Glu77 (33.80)<br>Lys175 / Asp136 (28.92)                                                                                                         |
| <b>System 4</b>      | Thr183 / Glu88 (68.25)<br>Lys184 / Glu88 (49.75)<br>Lys172 / Asp137 (37.33)<br>Lys172 / Asp136 (30.67)<br>Lys177 / Glu89 (30.17)<br>Lys182 / Ala112 (28.17)<br>Lys169 / Glu93 (18.92)<br>Lys176 / Glu93 (17.75)<br>Lys180 / Glu110 (16.50)                         | Lys172 / Asp136 (55.80)<br>Lys172 / Asp137 (53.70)<br>Lys169 / Glu93 (36.80)<br>Lys180 / Glu110 (22.30)<br>Lys177 / Glu89 (15.30)                         |
| <b>System 5</b>      | Thr183 / Glu110 (63.92)<br>Thr183 / Glu88 (55.42)<br>Ser181 / Glu88 (49.42)<br>Lys182 / Glu88 (45.17)<br>His95 / Pro113 (24.58)<br>Tyr64 / Met117 (24.17)<br>Lys180 / Glu88 (21.50)<br>Lys182 / Ala112 (17.42)<br>Lys180 / Glu89 (15.83)<br>Gln99 / Ser115 (15.08) | Lys182 / Glu110 (16.30)<br>Lys178 / Glu89 (15.25)                                                                                                         |
| <b>System 6</b>      | Arg73 / Glu77 (71.17)<br>Ser181 / Glu88 (34.42)<br>Asp69 / Lys79 (33.67)<br>Cys185 / Ala112 (31.08)<br>Lys182 / Glu88 (26.25)<br>Lys184 / Met118 (25.50)<br>Lys179 / Glu88 (23.67)<br>Arg73 / Glu89 (20.33)                                                        | Lys182 / Glu88 (25.70)<br>Lys179 / Glu88 (22.60)<br>Asp69 / Lys79 (22.50)                                                                                 |



**Table S3.** Types of atomic interactions of the HVRs of both K-Ras4A and N-Ras with PDE $\delta$ . The number in the parenthesis denotes percentage of the atomic pair interaction based on the distance between the paired atoms.

| <b>Configuration</b> | <b>H-bond<br/>HVR/ PDE<math>\delta</math> (%)</b>                                                                                                        | <b>Salt-bridge<br/>HVR / PDE<math>\delta</math> (%)</b> |
|----------------------|----------------------------------------------------------------------------------------------------------------------------------------------------------|---------------------------------------------------------|
| <b>System A1</b>     | Lys185 / Glu88 (43.95)<br>Lys182 / Glu88 (27.05)<br>Lys185 / Glu114 (18.15)                                                                              | Lys185 / Glu88 (97.3)                                   |
| <b>System A2</b>     | Lys185 / Glu88 (53.50)<br>Lys184 / Glu88 (45.75)<br>Lys185 / Glu88 (42.10)<br>Arg167 / Glu93 (31.25)<br>Arg167 / Glu93 (35.45)<br>Cys180 / Glu89 (17.60) | Lys185 / Glu88 (93.5)<br>Lys 173 / Glu89 (16.45)        |
| <b>System N1</b>     | Arg167 / Glu110 (35.75)<br>Cys181 / Glu110 (31.40)<br>Met182 / Glu88 (26.95)<br>Gly183 / Glu88 (24.60)<br>Cys181 / Ala112 (16.50)                        | NA                                                      |
| <b>System N2</b>     | Gly183 / Glu88 (17.10)<br>Arg167 / Glu110 (16.75)<br>Pro185 / Tyr149 (15.75)                                                                             | NA                                                      |
